# Supplementary material for: Differences in Hormone Levels Around Parturition in Hanwoo (Bos Taurus Coreanae) Following Artificial Insemination and Embryo Transfer
Source: Research Square preprint supplement (doi:10.21203/rs.3.rs-434371/v1), 2021-05-04
Supplement: Supplementary file 1 [file 396c7447922371543e70e349.docx]

**Supplementary Tables**

**Supplementary Table 1.** Progesterone, prolactin, and cortisol levels around parturition in Hanwoo.

**Supplementary Table 2.** **Differences in progesterone, prolactin, and cortisol level before and after parturition between ET (n = 9) and AI (n = 5) Hanwoo.**
